# Supplementary material for: COVID-19 and perinatal intimate partner violence: a cross-sectional survey of pregnant and postpartum individuals in the early stages of the COVID-19 pandemic
Source: PubMed Central journal article supplement — BMJ Open. 2021 May 26;11(5):e049295. doi: 10.1136/bmjopen-2021-049295 (PMC8728372; doi:10.1136/bmjopen-2021-049295), 2021-05-26
Supplement: bmjopen-2021-049295supp001.pdf [file bmjopen-2021-049295supp001.pdf]

*Appendix Tables perinatal IPV***Appendix 1. Data tables for figure 1**

| <b>Forms of regular controlling behaviour</b>                                | <b>n(%)</b> |
|------------------------------------------------------------------------------|-------------|
| Any controlling behaviour                                                    | 37 (17.21)  |
| Insist on knowing where you are at all times                                 | 18 (8.37)   |
| Try to keep you from seeing your friends                                     | 12 (5.58)   |
| Get angry if you speak with another man or a person they would be jealous of | 10 (4.65)   |
| Insist on coming to your healthcare appointments                             | 9 (4.19)    |
| Ignore you and/or treat you indifferently                                    | 9 (4.19)    |
| Try to restrict you from connecting with your family                         | 6 (2.79)    |
| Are often suspicious that you are unfaithful                                 | 5 (2.33)    |
| Expect you to ask their permission before seeking healthcare for yourself    | -           |

- Cell suppressed because of small cell size

*Appendix Tables perinatal IPV***Appendix 2. Data tables for figure 2**

| <b>Perinatal IPV variables</b> | <b>n(%)</b> |
|--------------------------------|-------------|
| Any acts of perinatal IPV      | 37 (17.21)  |
| 12 months pre-pregnancy        | 13 (6.05)   |
| During pregnancy               | 11 (5.12)   |
| Post-partum                    | 15 (6.98)   |
| Emotional abuse                |             |
| 12 months pre-pregnancy        | 11 (5.12)   |
| During pregnancy               | 11 (5.12)   |
| Post-partum                    | 15 (6.98)   |
| Any perinatal time period      | 22 (10.23)  |
| Physical abuse                 |             |
| 12 months pre-pregnancy        | -           |
| During pregnancy               | -           |
| Post-partum                    | -           |
| Any perinatal time period      | -           |
| Sexual abuse                   |             |
| 12 months pre-pregnancy        | 5 (2.33)    |
| During pregnancy               | -           |
| Post-partum                    | -           |
| Any perinatal time period      | 5 (2.33)    |

- Cell Cell suppressed because of small cell size

*Appendix Tables perinatal IPV***Appendix 3. Sensitivity analyses for bivariable and multivariable log binomial regression models to assess factors associated with perinatal IPV by removing 5 participants who indicated act-based pre-pregnancy IPV alone (n=211)<sup>1</sup>**

| <b>Co-Variables</b>                                        | <b>RR (95% CI)</b> | <b>p-value</b> | <b>ARR (95% CI)</b> | <b>p-value</b> |
|------------------------------------------------------------|--------------------|----------------|---------------------|----------------|
| Maternal Age in years (median, IQR)                        | 0.95 (0.90-1.01)   | 0.090          | 0.99 (0.94-1.05)    | 0.807          |
| Nulliparous vs multiparous                                 | 1.56 (0.85-2.85)   | 0.151          | 0.71 (0.41-1.24)    | 0.230          |
| Household income below vs above Ottawa median <sup>2</sup> | 3.47 (1.94-6.19)   | <0.001         | 3.42 (1.89-6.19)    | <0.001         |
| EPDS Score (continuous)                                    | 1.03 (0.99-1.08)   | 0.169          | 1.03 (0.98-1.07)    | 0.279          |
| Partner substance use increased                            | 1.16 (0.59-2.28)   | 0.667          | 0.67 (0.38-1.16)    | 0.153          |

1. Sample restricted to participants who reported any controlling behaviours or perinatal IPV acts during pregnancy and post-partum. Five individuals were removed from this analysis who reported perinatal IPV acts during the pre-pregnancy period alone
2. Missing data for household income was imputed by multiple imputation using chained equations and models were averaged across 10 imputed datasets
